# Supplementary material for: A sulfonated graphene supported nano copper MoS2 network for non-enzymatic simultaneous sensing of dopamine and serotonin
Source: Royal Society of Chemistry journal article supplement (doi:10.1039/d3nj03404f), 2023-01-01
Supplement: d3nj03404f1.pdf [file d3nj03404f1.pdf]

## Supporting Information

### **Sulfonated Graphene Supported Nano Copper MoS<sub>2</sub> Network for Non-enzymatic Simultaneous Sensing of Dopamine and Serotonin**

*Baishali Mahanta<sup>a</sup>, Hasan Al Mamun<sup>b</sup>, Rana Sanjay Kumar Singh<sup>b</sup> and Lakhya Jyoti Borthakur<sup>b\*</sup>*

<sup>a</sup>*Department of Chemistry, Gauhati University, Guwahati-781014, India.*

<sup>b</sup>*Department of Chemistry, Nowgong College (Autonomous), Assam-78200, India.*

*E-mail: [lborthakurpub2022@gmail.com](mailto:lborthakurpub2022@gmail.com)*

## S1 Experimental

### S1.1 Chemicals and Reagents

Dopamine hydrochloride, Serotonin hydrochloride, and Sodium molybdate were purchased from Sigma Aldrich (99.0% purity). Copper acetate (99.8%) pure was purchased from Merck. Graphite powder (99.8%), Orthophosphoric acid ( $\text{H}_3\text{PO}_4$ , 85%), Thiourea, Potassium dihydro phosphate, Potassium hydrogen phosphate, Potassium permanganate, Sulphuric acid, Hydrogen peroxide, and Sodium Hydroxide used were analytical grade. DW was used in all the experiments.

### S1.2 Preparation.

The schematic reactions for the synthesise of  $\text{MoS}_2/\text{SG}/\text{Cu}$  nanocomposite are given in *Scheme S1* as follows:

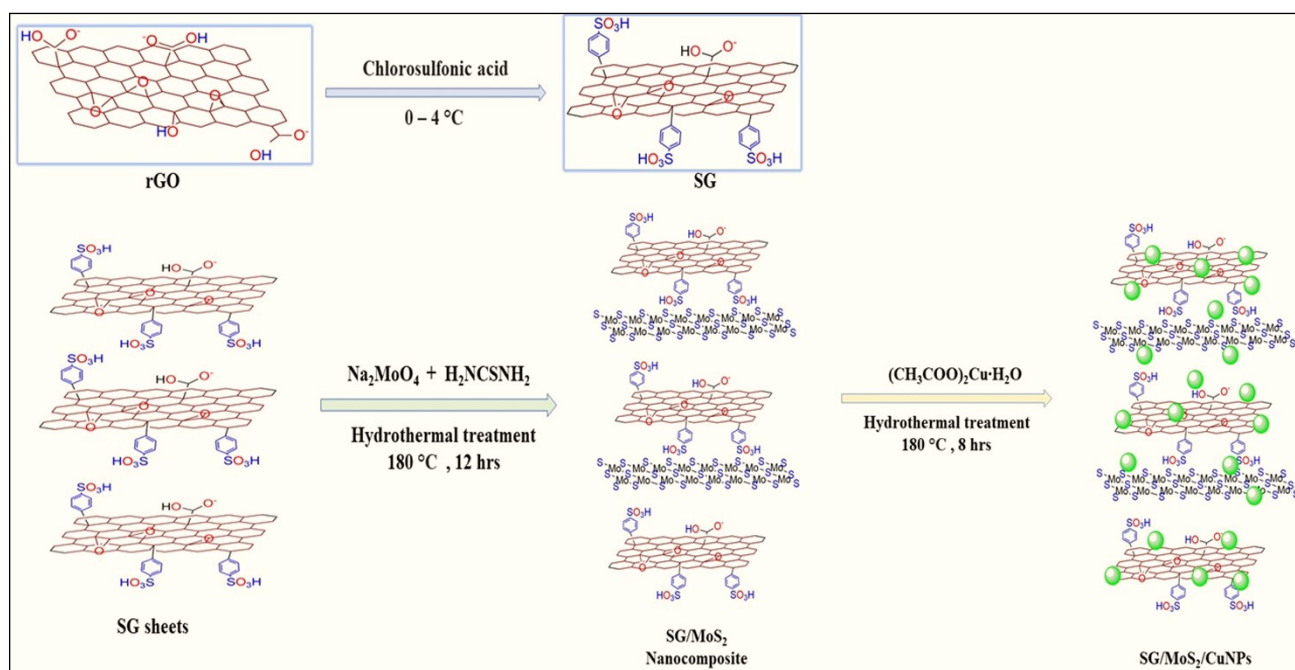

Scheme S1: Scheme representing the synthesis of  $\text{MoS}_2/\text{SG}/\text{Cu}$  nanocomposite

### S1.3 Instrumentation and Apparatus

X-ray diffraction (XRD) patterns were obtained using the Bruker D8 Discover with  $\text{Cu-K}\alpha$  radiation ( $\lambda = 1.54056 \text{ \AA}$ ) with a  $2\theta$  range of  $10^\circ$  to  $80^\circ$ . The Raman spectra were obtained on a Dongwoo Optron (Model: Vector-01FX) confocal Raman spectrometer using an argon-ion (488 nm) laser source. Scanning electron microscopy (SEM) was performed using a JEOL (JSM-

7000F) instrument equipped with energy-dispersive X-ray spectroscopy (EDAX) for morphological characterization and semi-quantitative information from the sample surface at a step size of  $0.01^\circ$  for the crystal structure analysis. Transmission electron microscope (TEM) observations were carried out using a JEOL 200 kV transmission electron microscope. X-ray photoelectron spectroscopy (XPS) analysis was carried out on a PHI 5000 Versa Probe III X-ray photoelectron spectrometer. The electrochemical activities of the modified electrodes were studied by Cyclic Voltammetry (CV), Chronoamperometry, EIS in a three-electrode system with a platinum wire, Ag/AgCl and a modified GCE as the auxiliary, reference, and the working electrode respectively. All the electrochemical experiments were performed in 0.1 M Phosphate Buffer Solution (PBS).

#### ***S1.4 Electrode preparation***

For each experiment, the GCE (Glassy carbon electrode) (working electrode) surface was polished in  $\text{Al}_2\text{O}_3$  slurries ( $1\ \mu\text{m}$  and  $0.05\ \mu\text{m}$ ) followed by repetitive ultrasonic washing with DIW-EtOH mixture until a mirror-clean surface was obtained. The working electrode was fabricated by drop-casting  $\text{MoS}_2/\text{SG}/\text{Cu}$  nanocomposite over the polished GCE. The nanocomposite was dispersed in a 2:1 isopropanol: Nafion mixture under ultrasonication till a uniform texture was achieved, where Nafion acts as the binder. A similar procedure was repeated to fabricate  $\text{SG}/\text{MoS}_2$  modified GCE. The electrodes obtained were dried at R.T. and used for further electrochemical sensing.

**S2 Schematic representation of reactions:**

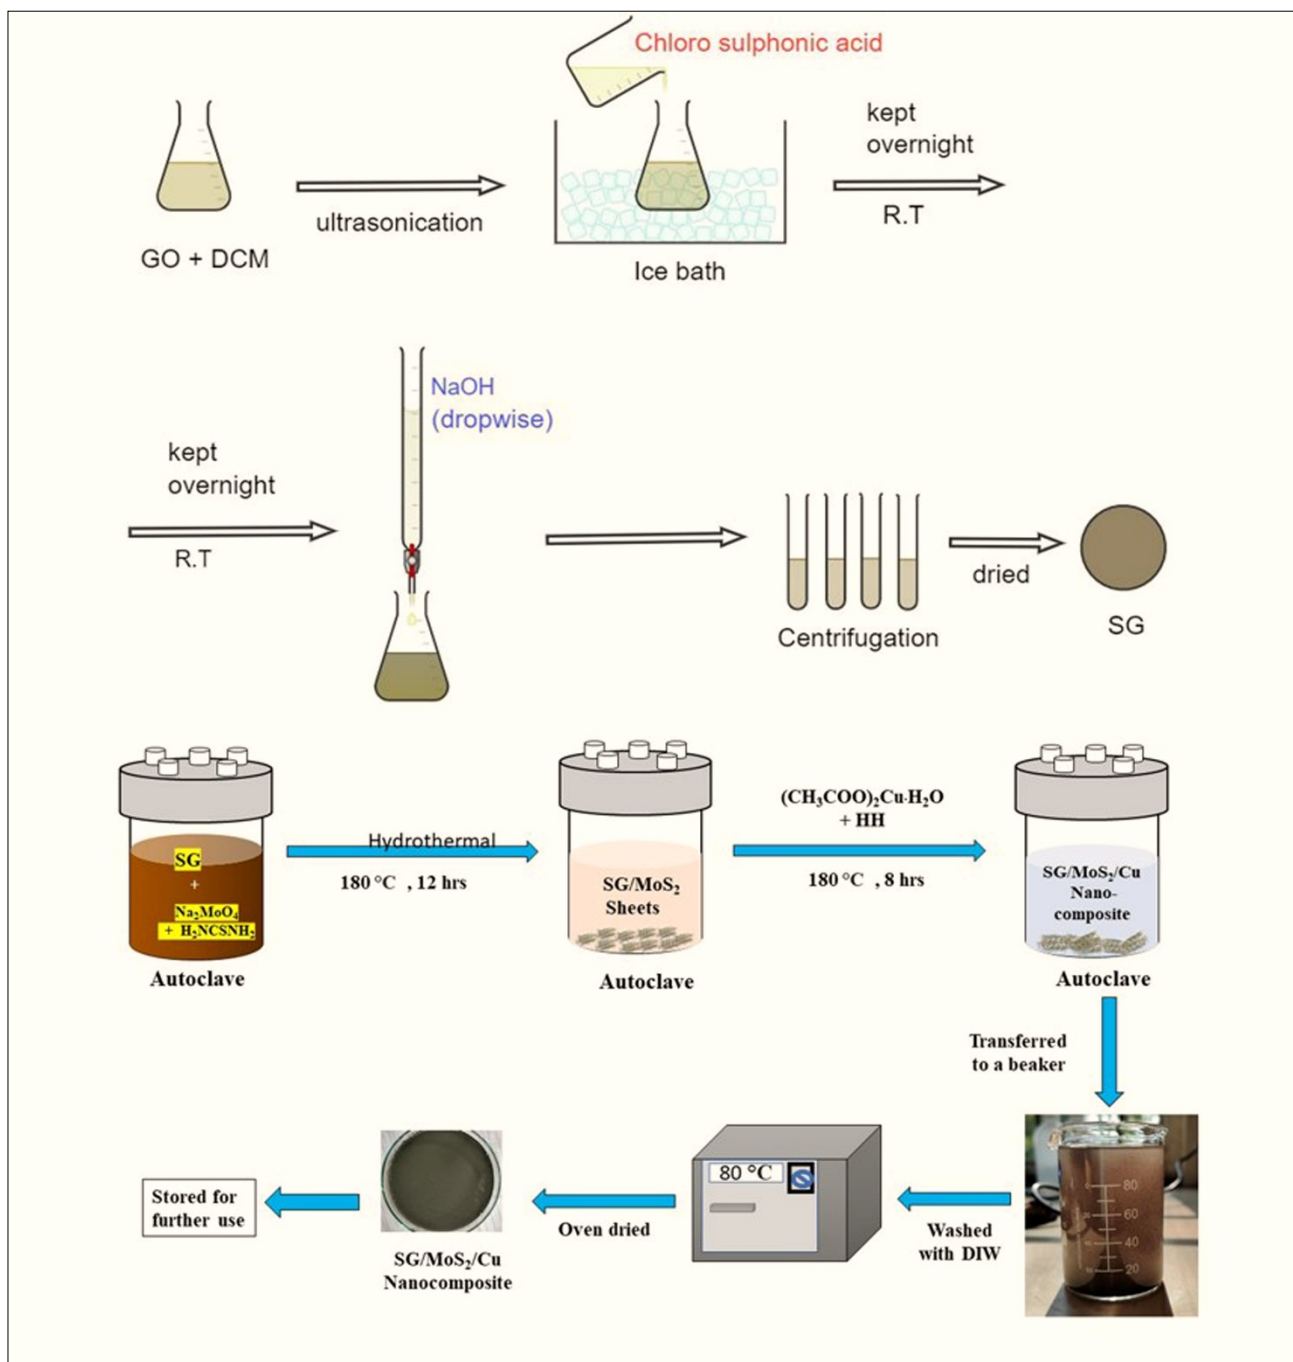

Scheme S2: Schematic pictorial representation of preparation of MoS<sub>2</sub>/SG/CuNP electrocatalyst

## S3 Results and Discussions

### S3.1 Raman Analysis

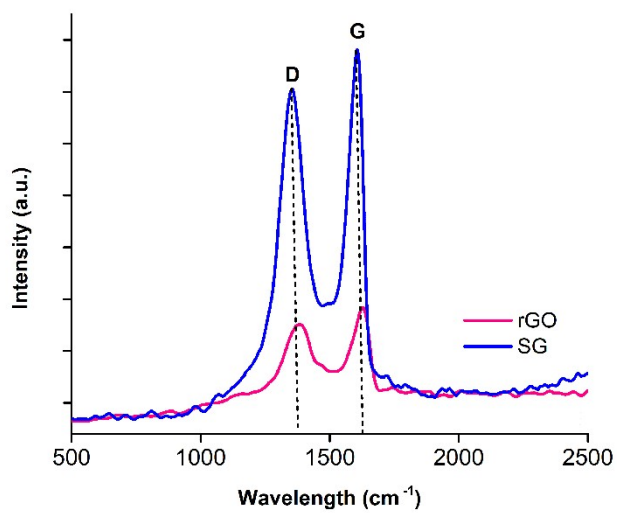

Figure S3: Raman spectra of rGO and SG

### S3.2 SEM Analysis

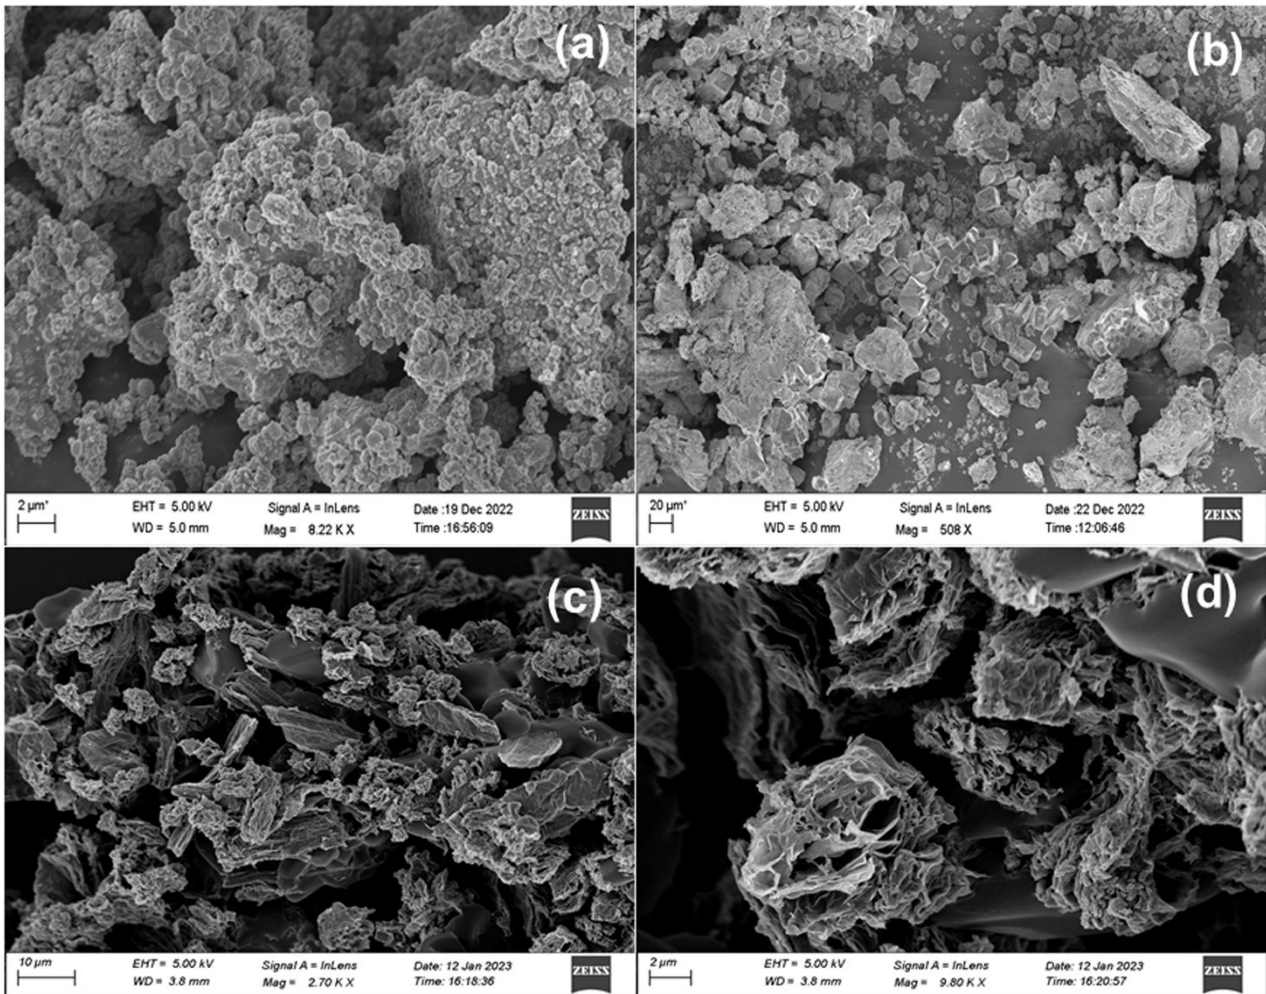

Figure S4 A: SEM imaging of (a) – (b) of Copper nanoparticles; (c) – (d) SG

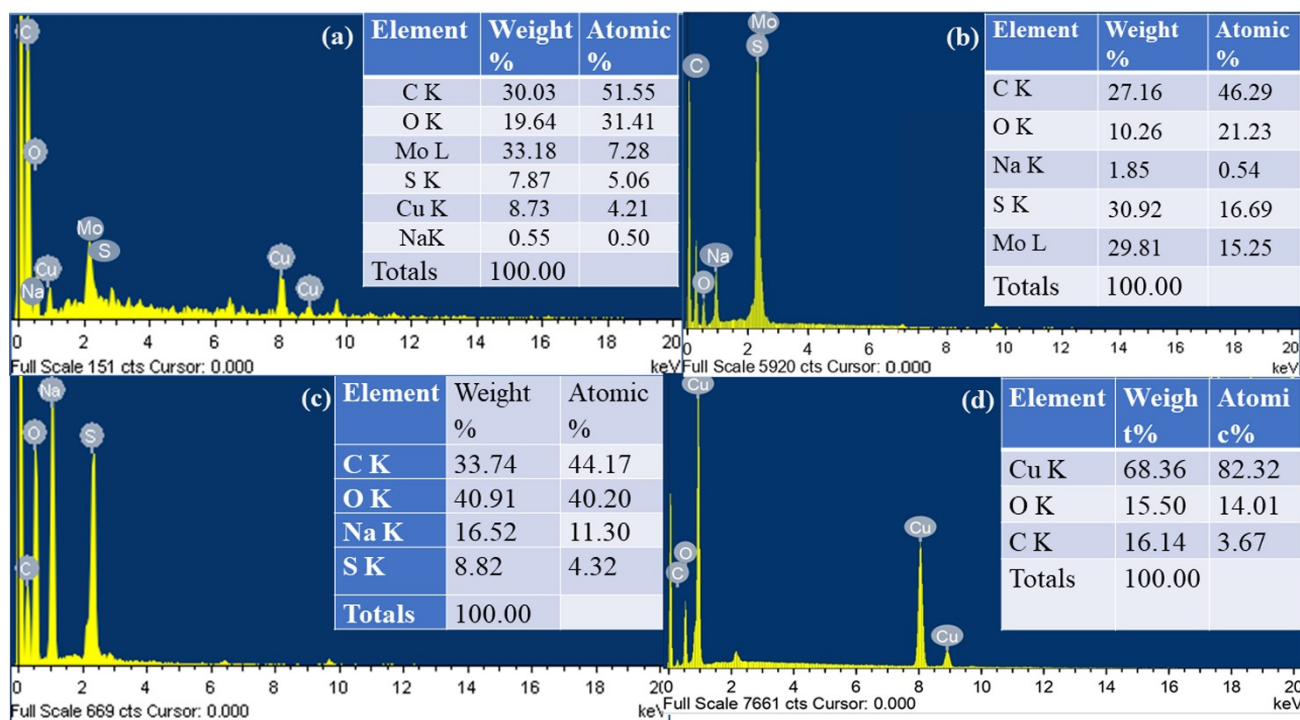

Figure S4 B: EDX of (a) MoS<sub>2</sub>/SG/CuNP (b) MoS<sub>2</sub>/SG (c) SG and (d) CuNP

## S4 Electrochemical behaviour of MoS<sub>2</sub>/SG/CuNP/GCE for the determination of DA and 5-HT individually

### S4.1 Effect of Change in pH

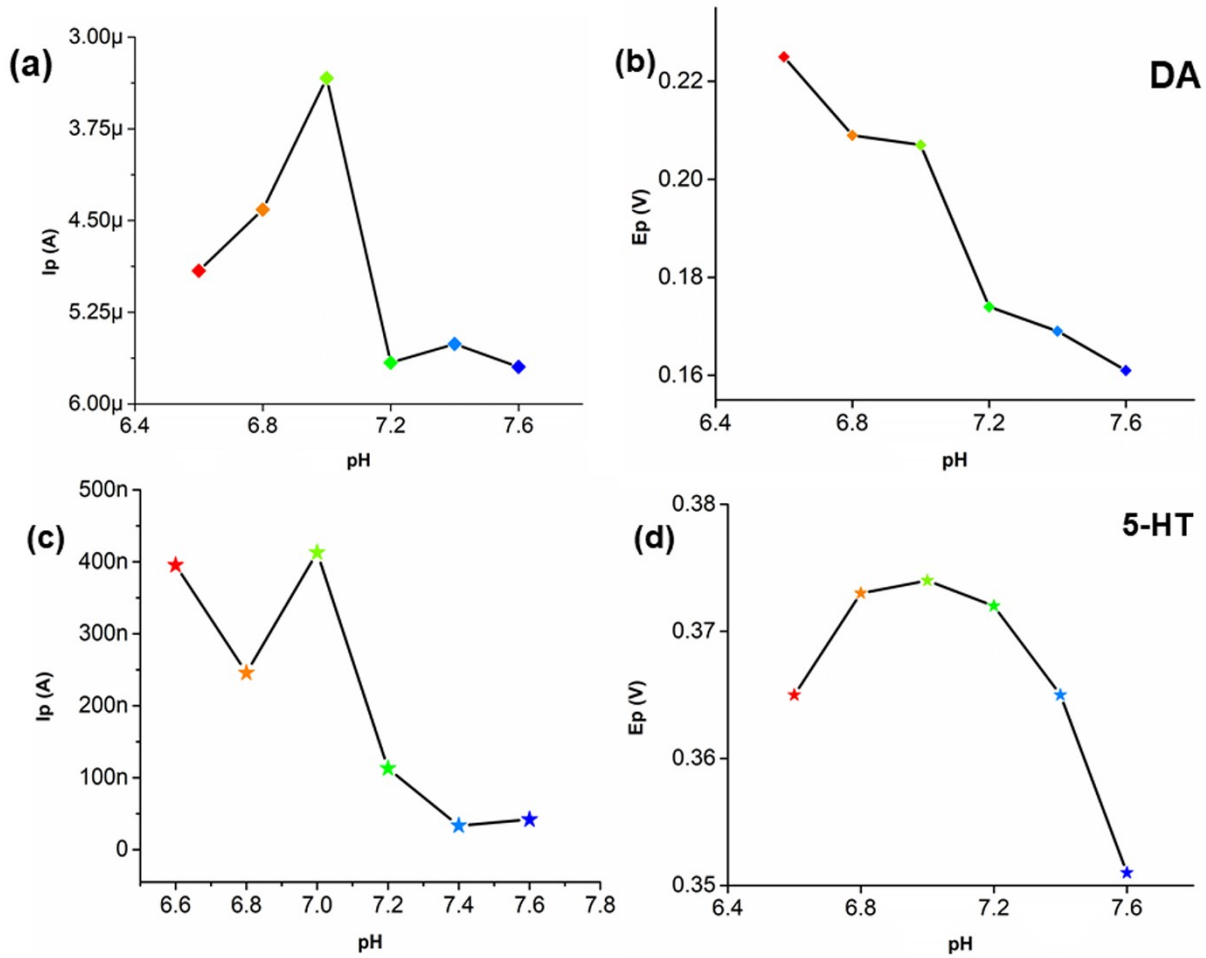

Figure S5: (a), (d) LAC for Ip vs pH; and (b), (d) for Ep vs pH, at 0.1M PBS for MoS<sub>2</sub>/SG/CuNP/GCE



## S4.2 Effect of Scan rate

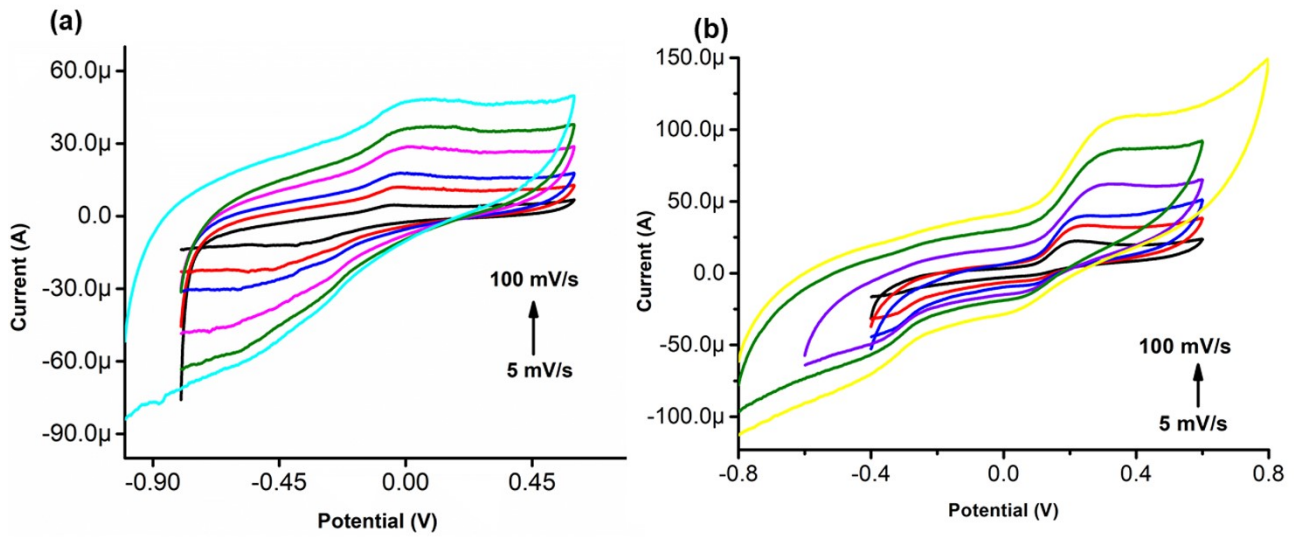

Figure S6: Effect of varying scan rate from 5mV/s to 100mV/s (a) DA and (b) 5-HT, at 0.1M PBS for MoS<sub>2</sub>/SG/CuNP/GCE

**S4.3 Table S1: Comparison of LOD of different electrodes**

| Electrode                                                                                    |      | Linear Electrode ( $\mu\text{M}$ ) | Detection Limit (nM) | Technique | Reference           |
|----------------------------------------------------------------------------------------------|------|------------------------------------|----------------------|-----------|---------------------|
| ZrO <sub>2</sub> -CuO co-doped                                                               | DA   | 0.008 - 7.2                        | 3.09                 | DPV       | [1]                 |
| CeO <sub>2</sub> Carbon paste electrode                                                      | 5-HT | 0.008 - 7.9                        | 3.42                 |           |                     |
| Rotating Disc electrode                                                                      | DA   | 0.01- 2                            | < 2.01               | SWV       | [2]                 |
|                                                                                              | 5-HT | 0.01- 2                            | 2.01                 |           |                     |
| GO/PANI/AuNP                                                                                 | 5-HT | 0.2 -10                            | 11.7                 | DPV       | [3]                 |
| CNF electrode                                                                                | DA   | -                                  | 50                   | DPV       | [4]                 |
| CNF electrode                                                                                | 5-HT | -                                  | 250                  | DPV       | [5]                 |
| Nafion and Multiwall Carbon Nanotube Modified Ultra nano crystalline Diamond Microelectrodes | DA   | 0.18 -1.7                          | 5.4                  |           |                     |
| MoS <sub>2</sub> /SG/CuNP                                                                    | 5-HT | 0.0005 - 0.005                     | 0.62                 | CV        | [ <i>Our Work</i> ] |
|                                                                                              | DA   | 0.001 - 0.05                       | 0.85                 |           |                     |

### S4.4 Repeatability, Stability, and Interference studies.

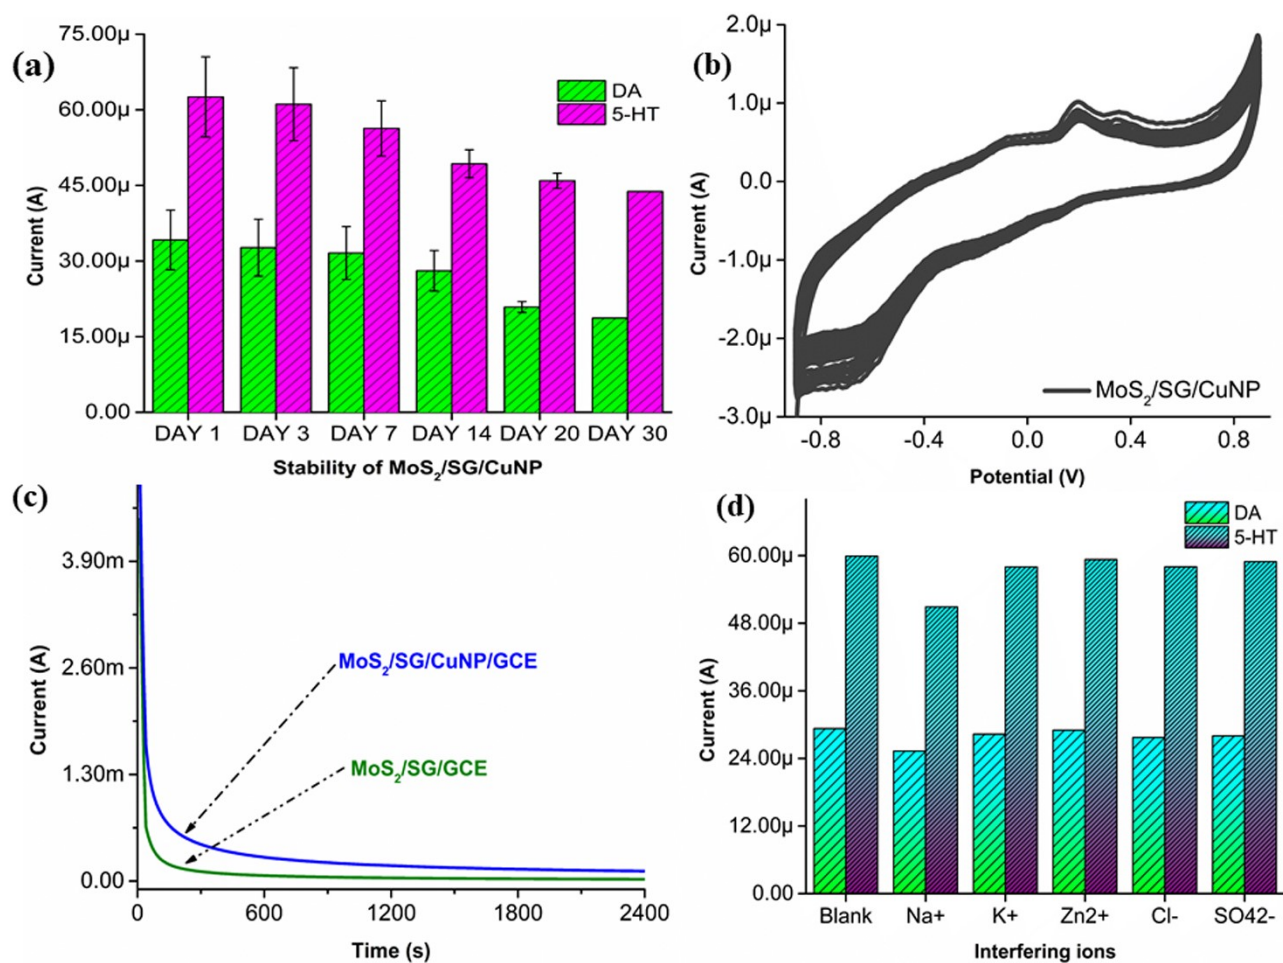

Figure S7: (a) Stability over a period of 30 days (b) Cyclic stability for 600 sweep cycles (c) Chronoamperometric stability comparison with SG/MoS<sub>2</sub>/SG/GCE; (d) Anti-interfering capacity of SG/CuNP modified electrode

**S4.5 Table S2: The recovery rate of DA and 5-HT in human urine samples using MoS<sub>2</sub>/SG/CuNP /GCE as the working electrode**

| Urine Sample | Analyte | Spiked<br>( $\mu\text{M}$ ) | Found<br>( $\mu\text{M}$ ) | Recovery<br>(%) |
|--------------|---------|-----------------------------|----------------------------|-----------------|
| Sample 1     | DA      | 40                          | 37.5                       | 93.80           |
|              | 5-HT    | 40                          | 37.3                       | 93.31           |
| Sample 2     | DA      | 30                          | 28.2                       | 94.12           |
|              | 5-HT    | 30                          | 28.7                       | 95.94           |
| Sample 3     | DA      | 20                          | 19.5                       | 97.82           |
|              | 5-HT    | 20                          | 19.3                       | 96.76           |
| Sample 4     | DA      | 10                          | 9.7                        | 96.69           |
|              | 5-HT    | 10                          | 9.8                        | 98.03           |
| Sample 5     | DA      | 1                           | 1.05                       | 105.21          |
|              | 5-HT    | 1                           | .98                        | 98.10           |
| Sample 6     | DA      | 0.1                         | 0.09                       | 97.80           |
|              | 5-HT    | 0.1                         | 0.1                        | 101.1           |
| Sample 7     | DA      | 0.01                        | 0.009                      | 97.81           |
|              | 5-HT    | 0.01                        | 0.009                      | 98.03           |

## S.5 Representation of Error Bars.

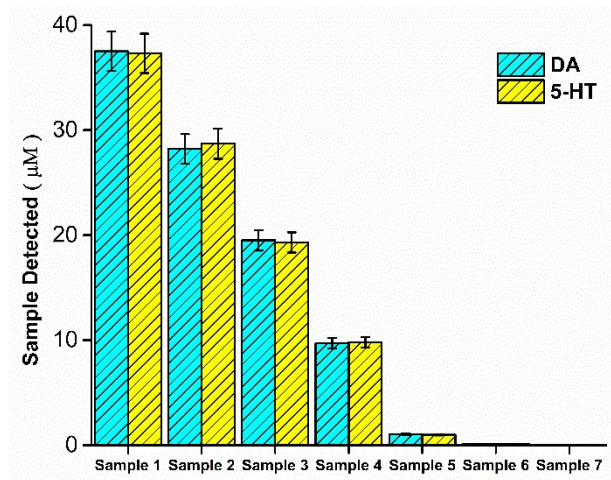

Figure S8: Representation of standard recovery of samples indicating the error bars

## S.6 Validation of the recoveries by classical detection technique

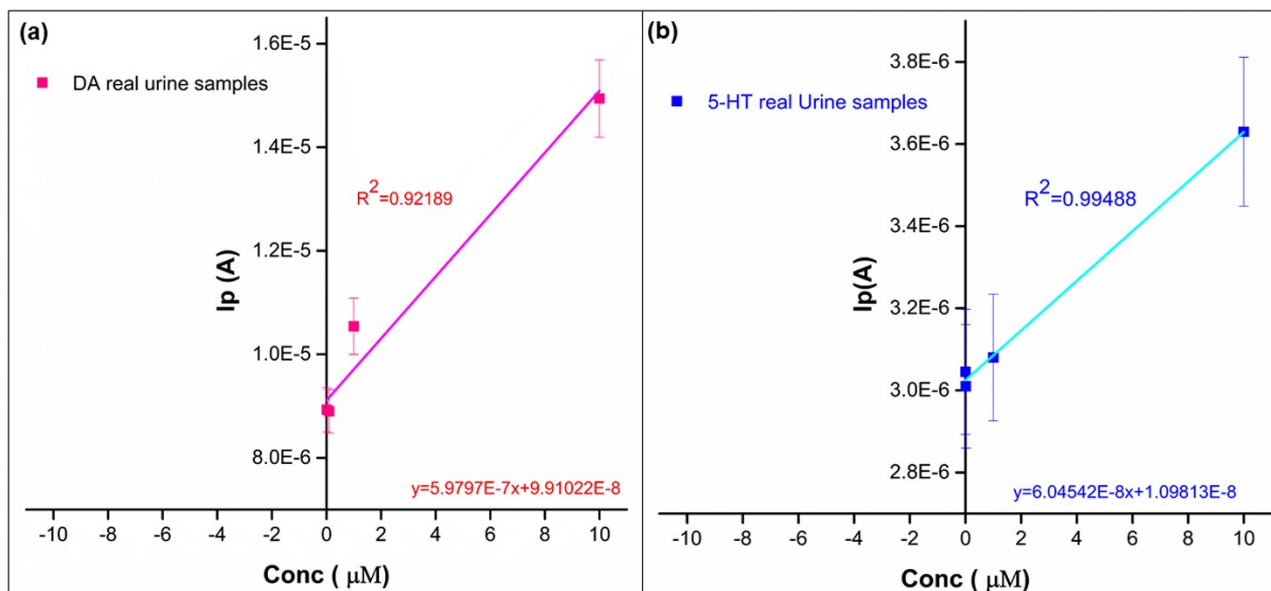

Figure S9: Linear dependence on anodic peaks at spiked lower concentration from 10 – 0.01  $\mu\text{M}$  for analytes (a) DA and (b) 5-HT in real human urine samples

## References:

1. F. Fariba and M. B. Gholivand, *Talanta*, 2022, **239**, 122982. DOI: [10.1016/j.talanta.2021.122982](https://doi.org/10.1016/j.talanta.2021.122982)
2. M. Kundys-Siedlecka, E. Bączyńska, & M. Jönsson-Niedziółka, *Anal. chem.*, 2019, **91**, 10908-10913. <https://doi.org/10.1021/acs.analchem.9b02967>
3. K. Mahato, B. Purohit, K. Bhardwaj, A. Jaiswal, P. Chandra, *Biosens. Bioelectron.*, 2019, **142**, 111502. DOI: [10.1016/j.bios.2019.111502](https://doi.org/10.1016/j.bios.2019.111502)
4. E. Rand, A. Periyakaruppan, Z Tanaka, A. D. Zhang, M. P. Marsh, R. J. Andrews, K. H. Lee, B. Chen, M. Meyyappan, J. E. Koehne, *Biosens. Bioelectron.*, 2013, **42**, 434-438. DOI: [10.1016/j.bios.2012.10.080](https://doi.org/10.1016/j.bios.2012.10.080)
5. A. Y. Chang, S. Siddiqui, & P. U. Arumugam, *Micromachines*, 2021, **12**, 523. DOI: [10.3390/mi12050523](https://doi.org/10.3390/mi12050523)
